# Supplementary material for: Mitophagy curtails cytosolic mtDNA-dependent activation of cGAS/STING inflammation during aging
Source: PubMed Central journal article supplement (PMC10821893; doi:10.1038/s41467-024-45044-1), 2024-01-27
Supplement: 41467_2024_45044_MOESM1_ESM.pdf [file 41467_2024_45044_MOESM1_ESM.pdf]

Supplementary Information for:

Mitophagy curtails cytosolic mtDNA-dependent activation of  
cGAS/STING inflammation during aging

Juan Ignacio Jiménez-Loygorri<sup>1</sup>, Beatriz Villarejo-Zori<sup>1</sup>, Álvaro Viedma-Poyatos<sup>1</sup>, Juan Zapata-Muñoz<sup>1</sup>, Rocío Benítez-Fernández<sup>1,2</sup>, María Dolores Frutos-Lisón<sup>3</sup>, Francisco A. Tomás-Barberán<sup>3</sup>, Juan Carlos Espín<sup>3</sup>, Estela Area-Gómez<sup>1</sup>, Aurora Gómez-Durán<sup>4,5</sup>, Patricia Boya<sup>1,2\*</sup>

Corresponding author: [patricia.boya@unifr.ch](mailto:patricia.boya@unifr.ch)

The PDF file includes:

Supplementary Figures 1 to 10

Supplementary Table 1

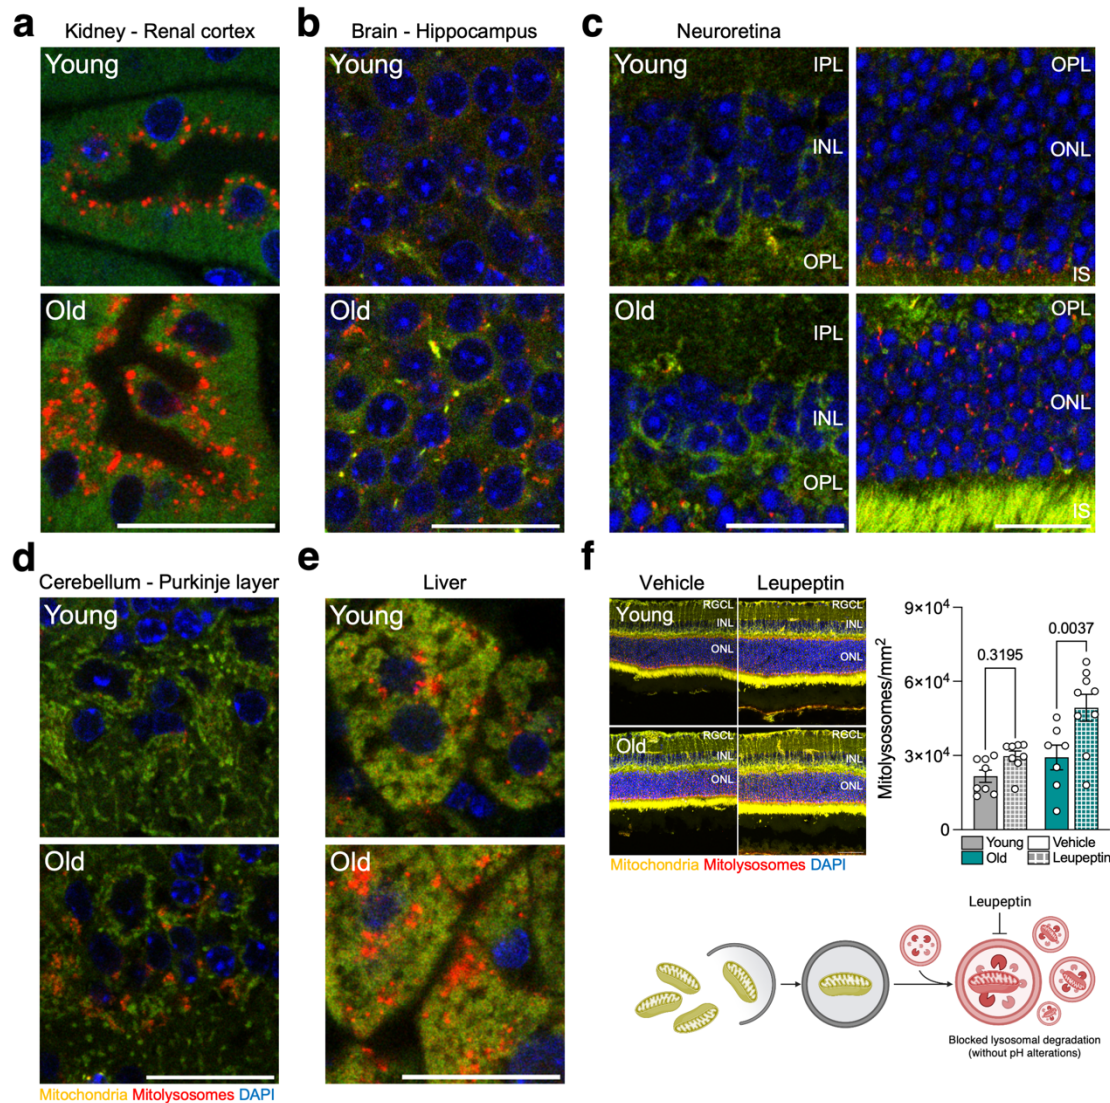

**Supplementary Fig. 1. Mitophagy during physiological aging.** High magnification images from Fig.1 of young (6–8 months) and old (24–26 months) *mito-QC* reporter mice bred on a C57Bl6/J background. **a** Kidney, renal cortex. **b** Brain, hippocampus. **c** Neuroretina, inner nuclear layer (INL, left) and outer nuclear layer (ONL, right). **d** Cerebellum, Purkinje layer. **e** Liver. **f** Young (8 months) and old (26 months) *mito-QC* mice were administered a single intraperitoneal injection of protease inhibitor Leupeptin (40 mg/kg) or vehicle (saline). Representative images and quantification of mitolysosome number are shown ( $n = 7-9$  mice).

Scale bars, 25  $\mu\text{m}$  (**a-e**) and 50  $\mu\text{m}$  (**f**). All data are expressed as the mean  $\pm$  s.e.m. Dots represent independent experiments. *P* values were calculated using 2-way ANOVA with Šídák's *post-hoc* test (**f**). Created with BioRender.com Source data are provided as a Source Data file.

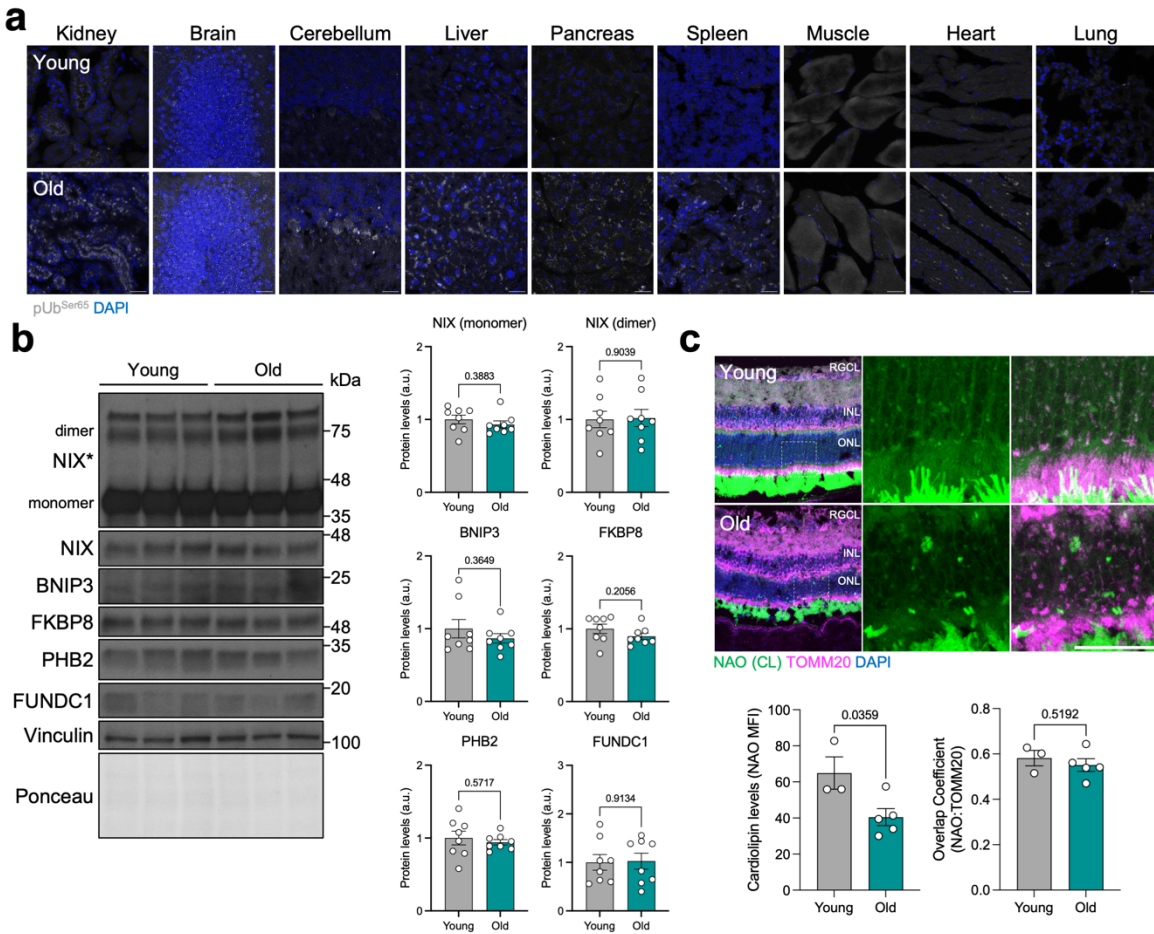

**Supplementary Fig. 2. Mitophagy pathways during physiological aging.** **a** Representative images showing phospho-Ubiquitin<sup>Ser65</sup> (gray) immunostaining of cryosections of the kidney, brain, cerebellum, liver, pancreas, spleen, muscle, heart, and lung from young and old mice, as shown in Fig. 1d. **b** Western blot analysis of mitophagy receptors (BNIP3L/NIX, BNIP3, FKBP8, PHB2, FUNDC1) in the retinas of young and old mice ( $n = 8$  mice). Vinculin was used as a loading control. Asterisk indicates higher exposure for chemiluminescence detection. **c** Immunostaining for mitochondria (TOMM20, magenta) and cardiolipin (CL) labelling (Nonyl acridine orange; NAO, green): representative images and corresponding quantification of CL levels and TOMM20:CL colocalization ( $n = 3-5$  mice). Scale bars, 25  $\mu\text{m}$  (**a**, **c**). All data are



expressed as the mean  $\pm$  s.e.m. Dots represent individual mice. *P* values were calculated using a two-tailed Student's *t*-test. Source data are provided as a Source Data file.

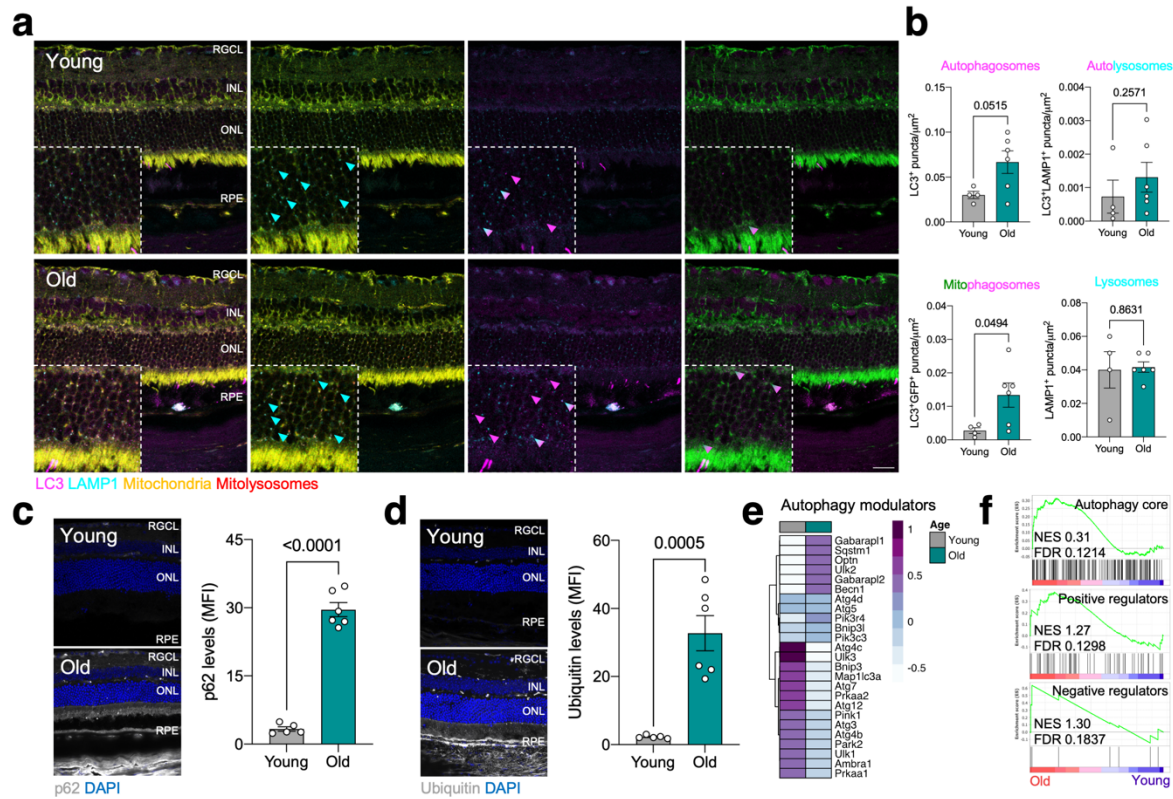

**Supplementary Fig. 3. Macroautophagy during physiological aging.** **a** Representative images showing immunostaining for LC3 (magenta, autophagic vesicles) and LAMP1 (cyan, lysosomes) in whole eye cryosections from young and old *mito-QC* mice. **b** Quantification of the number of autophagosomes (LC3<sup>+</sup>), autolysosomes (LC3<sup>+</sup>LAMP1<sup>+</sup>), mitophagosomes (LC3<sup>+</sup>GFP<sup>+</sup>), and lysosomes (LAMP1<sup>+</sup>) in **a** ( $n = 7-9$  mice). **c** Immunostaining for SQSTM1/p62 (grey): representative images and corresponding quantification of whole eye cryosections from young and old mice ( $n = 5-6$  mice). **d** Immunostaining for Ubiquitin (grey): representative images and corresponding quantification of whole eye cryosections from young and old mice ( $n = 5-6$  mice). **e** Heatmap depicting the expression levels of autophagy and mitophagy regulators in the retina of individual young and old mice. **f** Enrichment analysis of core machinery, positive and negative regulators of autophagy. Scale bars, 25  $\mu\text{m}$  (**a**, **c**, **d**). All data are expressed as the mean  $\pm$  s.e.m.

Dots represent individual mice. *P* values were calculated using a two-tailed Student's *t*-test (**b** [autophagosomes, mitophagosomes, lysosomes], **c**, **d**) or two-tailed Mann-Whitney *U*-test (**b** [autolysosomes]). Source data are provided as a Source Data file.

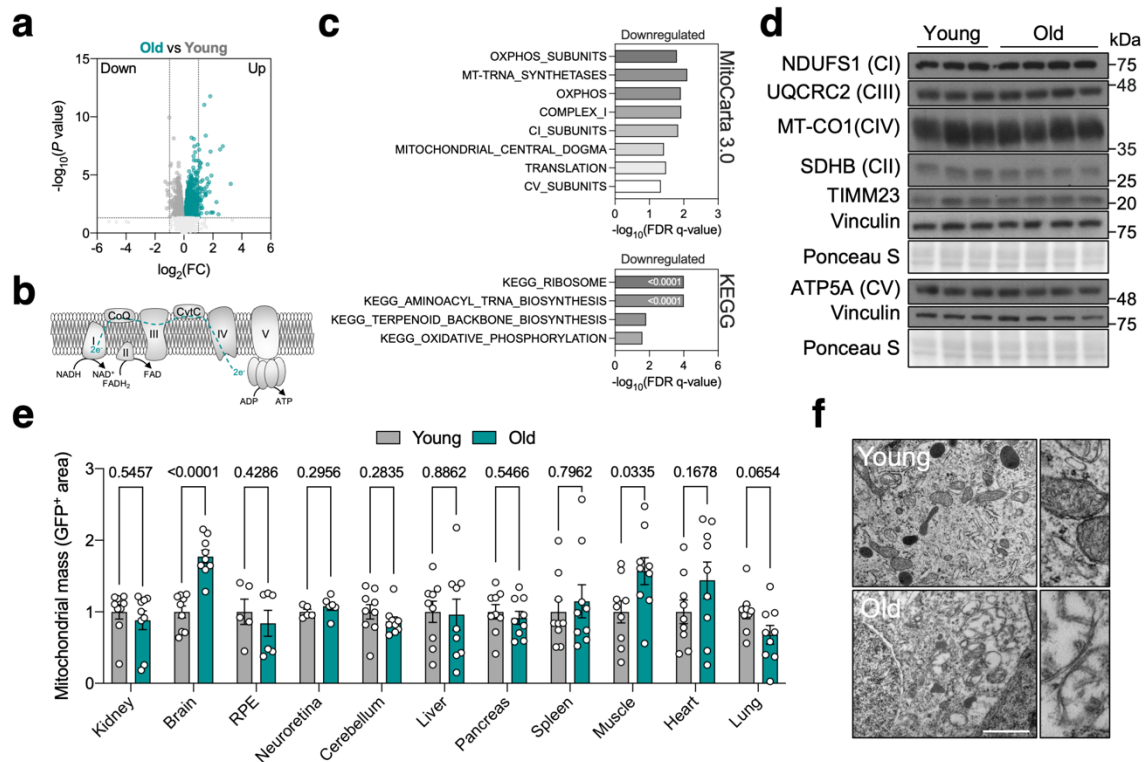

**Supplementary Fig. 4. No gross alterations in mitochondria levels are observed in old versus young mice.** **a** Volcano plot depicting differentially-expressed genes (DEGs) in young and old mouse retinas. **b** Diagram showing the main components and substrates of the mitochondrial electron transport chain (ETC). **c** Enrichment analysis showing MitoCarta 3.0 (top) and KEGG (bottom) pathways that are downregulated in old versus young retinas. **d** Western blot analysis of mitochondrial ETC components (CI-NDUFS1, CII-SDHB, CIII-UQCRC2, CIV-MT-CO1, CV-ATP5A) and total mitochondrial mass (TIMM23) in the retinas of young and old mice. Vinculin was used as a loading control. **e** Mitochondrial mass analysis of Fig. 1B, identified as the GFP<sup>+</sup> area corresponding to cytoplasmic mitochondria ( $n = 5-9$  mice). **f** Representative electron microscopy images of the retina of young and old mice. Insets show

higher magnification images of mitochondria. Scale bar, 2  $\mu\text{m}$  (f). All data are expressed as the mean  $\pm$  s.e.m. Dots represent individual mice. *P* values were calculated using the two-tailed Student's *t*-test (e, brain, neuroretina, cerebellum, liver, pancreas, muscle, heart, lung) or two-tailed Mann-Whitney *U*-test (e, kidney, RPE, spleen). Source data are provided as a Source Data file.



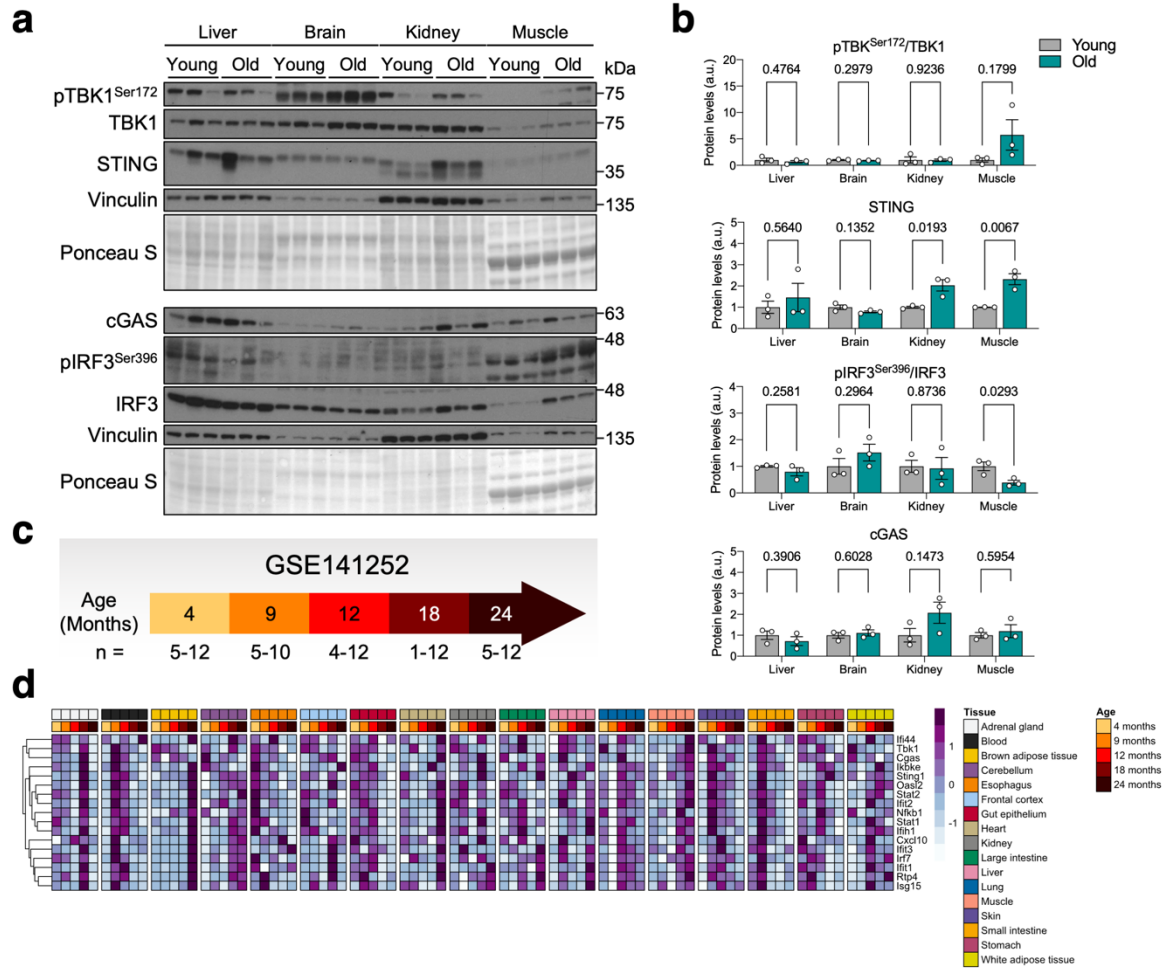

**Supplementary Fig. 5. cGAS/STING signaling in other organs during physiological aging. a** Western blot analysis of cGAS/STING mediators (TBK1, IRF3, cGAS, STING) in the liver, brain, kidney, and muscle of young and old mice. Protein levels were normalized to loading control (Vinculin in liver, brain, and kidney; Ponceau in muscle). **b** Quantification of protein levels in a ( $n = 3$  mice). **c** Experimental design: bulk RNA-seq of 17 different organs from C57Bl6/J mice collected at 4, 9, 12, 18, or 24 months (GSE141252; Stoeger et al., 2022). **d** Heatmap showing expression of cGAS/STING pathway modulators in samples from c. All data are expressed as the mean  $\pm$  s.e.m. Dots represent individual mice.  $P$  values were calculated using the two-tailed Student's  $t$ -test. Source data are provided as a Source Data file.

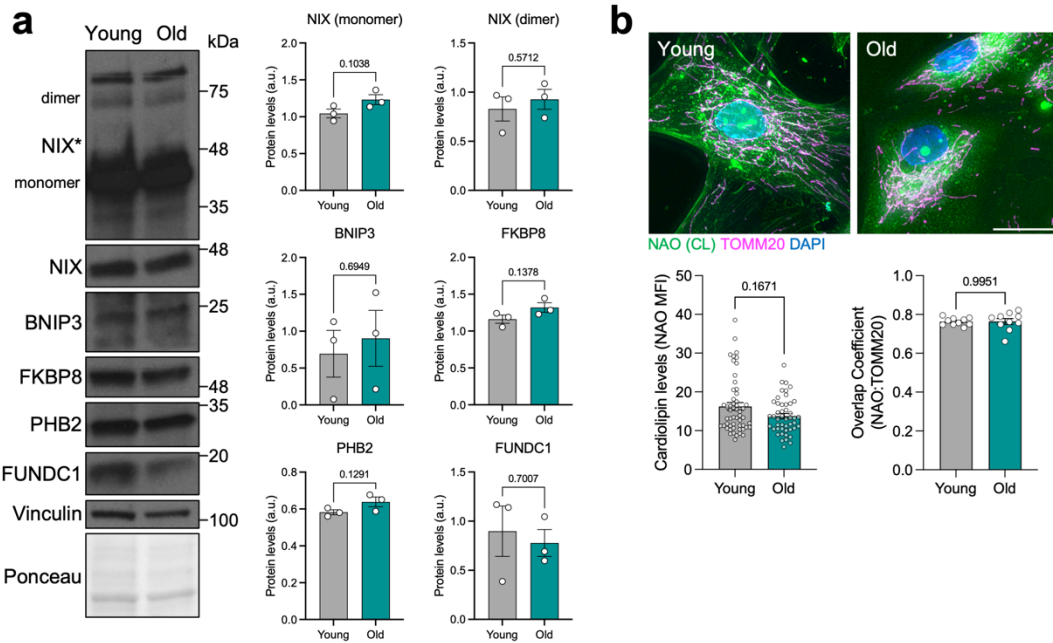

**Supplementary Fig. 6. Receptor- and lipid-mediated mitophagy in old NHDFs.** **a** Western blot analysis of mitophagy receptors (BNIP3L/NIX, BNIP3, FKBP8, PHB2, FUNDC1) in NHDFs from young and old donors ( $n = 3$  biological replicates). Vinculin was used as a loading control and asterisk indicates higher exposure for chemiluminescence detection. **b** Immunostaining for mitochondria (TOMM20, magenta) and cardiolipin (CL) labelling (NAO, green): representative images and corresponding quantification of CL levels ( $n = 47$ -54 cells) and TOMM20:CL colocalization ( $n = 10$  pictures). Scale bars, 25  $\mu\text{m}$  (**b**). All data are expressed as the mean  $\pm$  s.e.m. Dots represent individual mice.  $P$  values were calculated using a two-tailed Mann-Whitney  $U$ -test (**b**, left) or two-tailed Student's  $t$ -test (**b**, right). Source data are provided as a Source Data file.

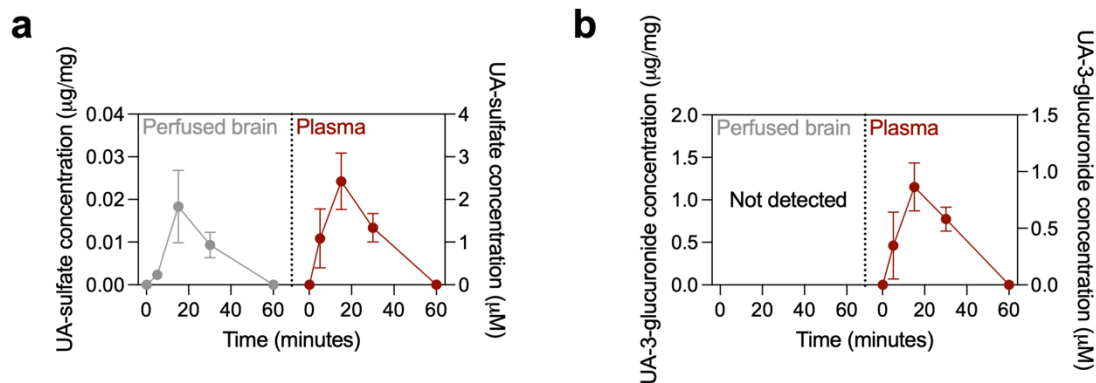

**Supplementary Fig. 7. Detection of UA conjugates in perfused brain and plasma samples from C57Bl6/J mice.** **a** Quantification of the levels of conjugated UA-sulfate by UPLC-ESI-QTOF-MS in perfused brain and plasma. **b** Quantification of levels of conjugated UA-3-glucuronide by UPLC-ESI-QTOF-MS in perfused brain (not detected) and plasma. All data are expressed as the mean  $\pm$  s.e.m. of 2–3 mice per timepoint. Source data are provided as a Source Data file.

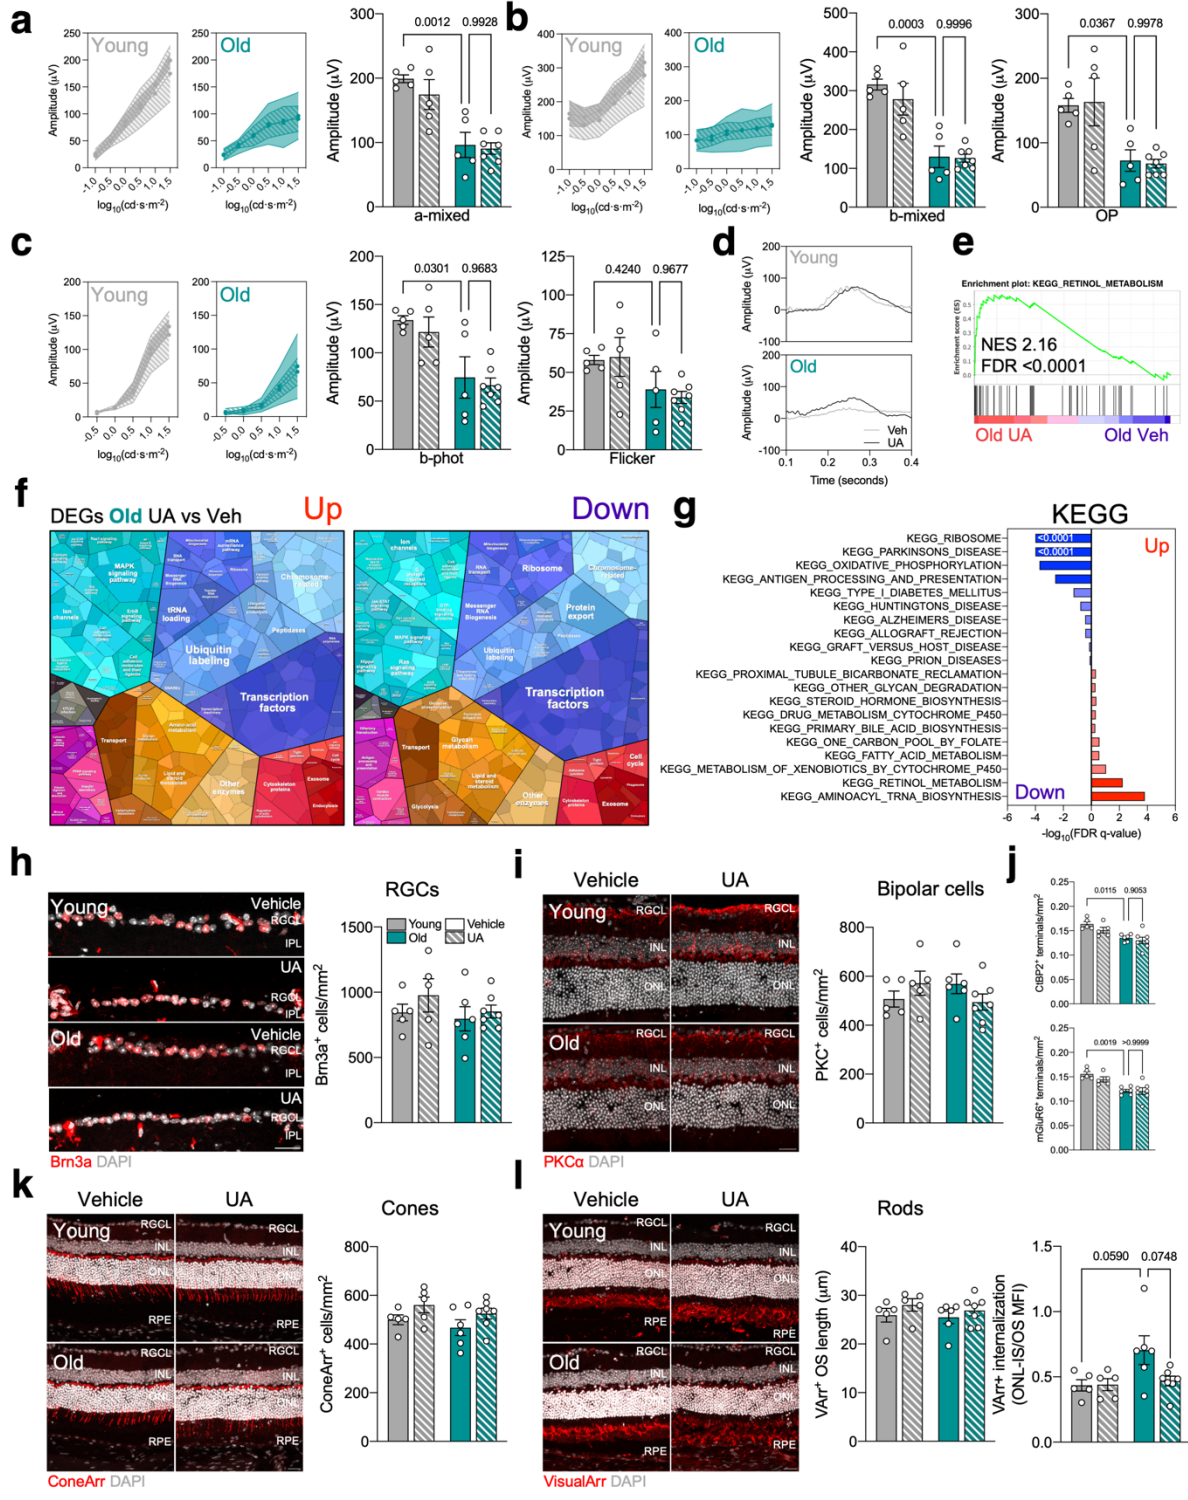

**Supplementary Fig. 8. Prolonged UA administration does not induce side effects in the mouse retina.** **a** ERG assessment of visual function (a-wave) in high intensity scotopic conditions and quantification of mixed a-wave amplitude ( $\mu\text{V}$ ) at  $32 \text{ cd}\cdot\text{s}\cdot\text{m}^{-2}$  in young and old mice treated with vehicle or UA ( $n = 5-7$  mice). **b** ERG assessment of visual function (b-wave and oscillatory potentials [OP]) in high intensity scotopic conditions and quantification of mixed b-wave and OP amplitude ( $\mu\text{V}$ ) at  $32 \text{ cd}\cdot\text{s}\cdot\text{m}^{-2}$  in young and old mice treated with vehicle or UA ( $n = 5-7$  mice). **c** ERG assessment of visual function (b-wave and flicker) in photopic conditions and quantification of mixed b-wave and flicker amplitude ( $\mu\text{V}$ ) at  $32 \text{ cd}\cdot\text{s}\cdot\text{m}^{-2}$  in young and old mice treated with vehicle or UA ( $n = 5-7$  mice). **d** Graph depicting scotopic ERG amplitude from **Fig. 4g**. **e** Enrichment analysis of retinol metabolism (KEGG) using transcriptomic data from old mice treated with vehicle or UA. **f** Geometric Proteomap depicting DEGs that are up- or downregulated in UA-treated old mice compared with vehicle-treated counterparts. Shape size is proportional to the fold-change (minor grid) and number (major grid) of genes associated with the corresponding. **g** Bulk RNA-seq: top enriched KEGG pathways in UA- versus vehicle-treated old mice. **h** Brn3a<sup>+</sup> immunostaining in retinal ganglion cells (RGCs, red): representative images and corresponding quantification ( $n = 5-7$  mice). **i** PKC $\alpha$ <sup>+</sup> immunostaining of bipolar interneurons (red): representative images and quantification ( $n = 5-7$  mice). **j** Quantification of the number of CtBP2<sup>+</sup> (photoreceptor, pre-synaptic) and mGluR6<sup>+</sup> (bipolar, post-synaptic) terminals from Fig. 4h ( $n = 5-7$  mice). **k** ConeArrestin<sup>+</sup> immunostaining to identify cone photoreceptors (red): representative images and corresponding quantification ( $n = 5-7$  mice). **l** VisualArrestin<sup>+</sup> immunostaining: representative images and quantification of rod photoreceptor (red) length and internalization ( $n = 5-7$  mice). Scale bars,  $15 \mu\text{m}$  (**h**, **j**, **k**, **l**). All data are



expressed as the mean  $\pm$  s.e.m. Dots represent individual mice. *P* values were calculated using 2-way ANOVA with Tukey's *post-hoc* test. Source data are provided as a Source Data file.

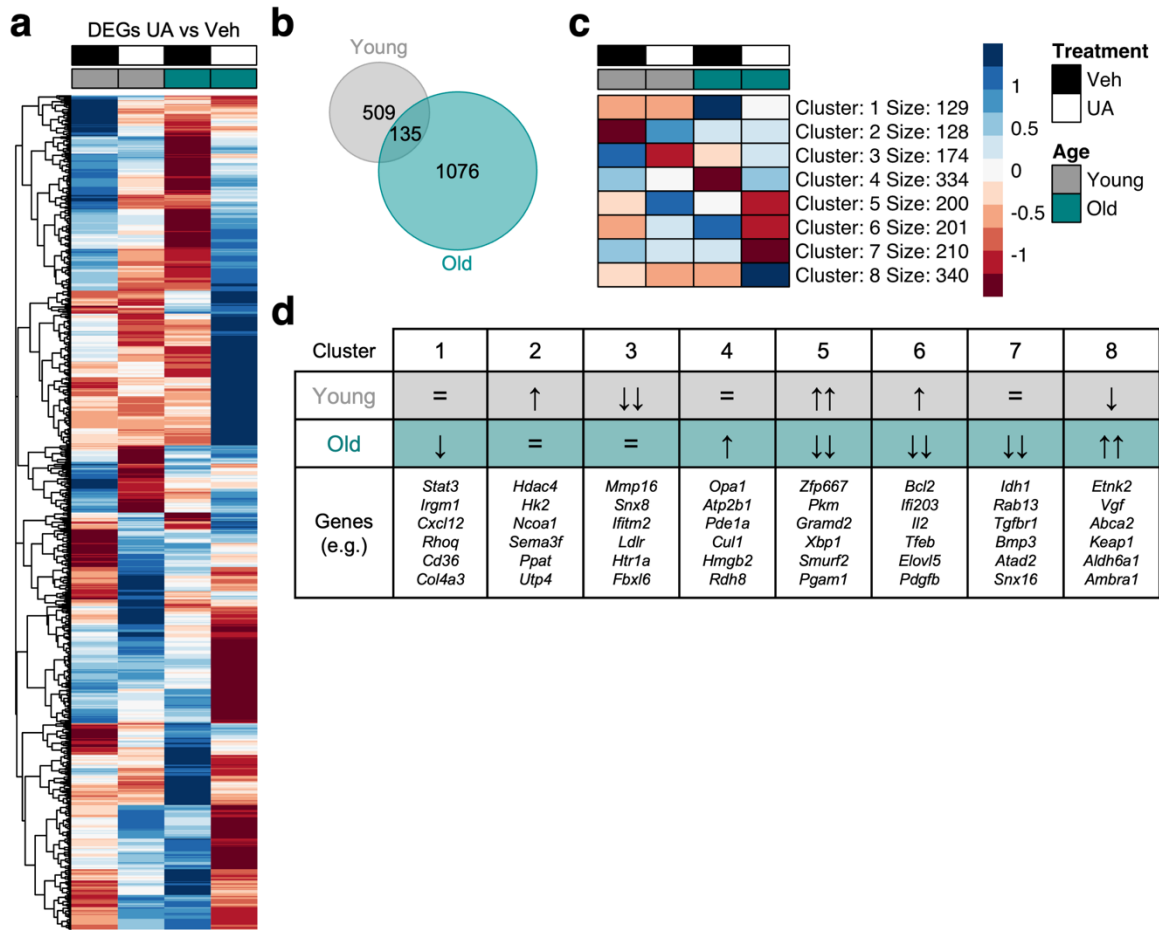

**Supplementary Fig. 9. Transcriptomic changes with UA treatment are age-dependent. a** Heatmap depicting DEGs in young and old mice treated with UA. **b** Venn diagram showing DEGs in the retina of UA-treated young and old mice. **c** *k*-means clustering of DEGs into 8 distinct clusters. **d** Classification of the clusters identified in **c** and examples of corresponding genes.

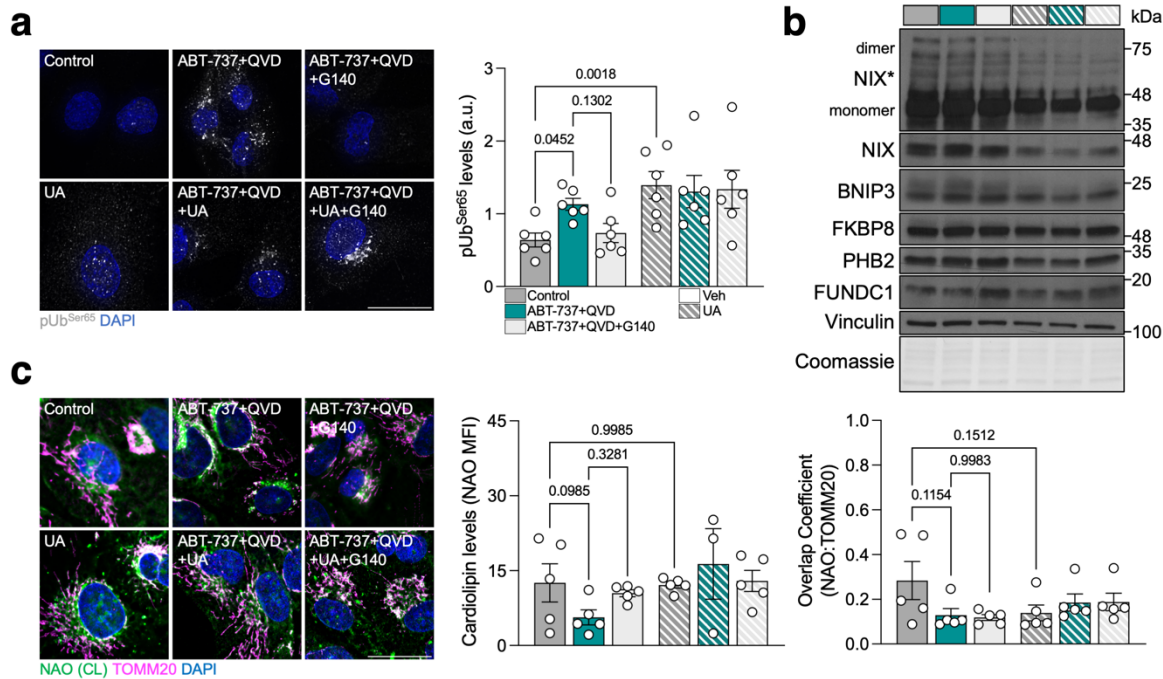

**Supplementary Fig. 10. Mitophagy pathways in ARPE-19 cells treated with ABT-737. a** Representative images showing phospho-Ubiquitin<sup>Ser65</sup> immunostaining (gray) in ARPE-19 cells treated with ABT-737 and/or UA, and corresponding quantification ( $n = 5$  independent experiments). **b** Western blot analysis of mitophagy receptors (BNIP3L/NIX, BNIP3, FKBP8, PHB2, FUNDC1) in ARPE-19 cells ( $n =$  representative of 3 independent experiments). Vinculin was used as a loading control and asterisk indicates higher exposure for chemiluminescence detection. **c** Immunostaining for mitochondria (TOMM20, magenta) and cardiolipin (CL) labelling (NAO, green): representative images and corresponding quantification of CL levels and TOMM20:CL colocalization ( $n = 5$  independent experiments). Scale bars, 25  $\mu\text{m}$  (**a**, **c**). All data are expressed as the mean  $\pm$  s.e.m. Dots represent independent experiments (**a**) or images (**c**).  $P$  values were calculated using a 1-way ANOVA with Šidák's *post-hoc* test (**a**, **c**). Source data are provided as a Source Data file.

| Antigen specificity           | Species | Dilution      | Application | Supplier         | Reference  |
|-------------------------------|---------|---------------|-------------|------------------|------------|
| phospho-Ubiquitin(Ser65)      | Rabbit  | 1:200         | IF          | Merck            | ABS1513-I  |
| DNA                           | Mouse   | 1:50          | IF          | Progen           | 61014      |
| phospho-TBK1(Ser172)          | Rabbit  | 1:1000        | WB          | Cell Signaling   | 5483       |
| TBK1                          | Rabbit  | 1:1000        | WB          | Cell Signaling   | 3504       |
| STING (Mouse)                 | Rabbit  | 1:1000        | WB          | Cell Signaling   | 50494      |
| eGAS (Mouse)                  | Rabbit  | 1:100, 1:1000 | IF, WB      | Cell Signaling   | 31659      |
| phospho-IRF3(Ser396)          | Rabbit  | 1:500-1:1000  | WB          | Cell Signaling   | 29047      |
| IRF3 (Mouse)                  | Rabbit  | 1:1000        | WB          | Cell Signaling   | 4302       |
| Vinculin                      | Rabbit  | 1:1000        | WB          | Abcam            | ab129002   |
| TOMM20                        | Rabbit  | 1:200-1:500   | IF          | Santa Cruz       | sc-11415   |
| CtBP2                         | Mouse   | 1:100         | IF          | BD               | 612044     |
| mGluR6                        | Rabbit  | 1:100         | IF          | Alomone          | AGC-026    |
| 4-hydroxynonenal              | Rabbit  | 1:100         | IF          | Abcam            | ab46545    |
| GFAP                          | Rabbit  | 1:500         | IF          | Dako             | Z0334      |
| GS                            | Mouse   | 1:500         | IF          | Millipore        | MAB302     |
| Iba1                          | Rabbit  | 1:100         | IF          | Wako             | 019-19741  |
| STING (Human)                 | Rabbit  | 1:1000        | WB          | Cell Signaling   | 13647      |
| eGAS (Human)                  | Rabbit  | 1:500         | WB          | Cell Signaling   | 15102      |
| IRF3 (Human)                  | Rabbit  | 1:1000        | WB          | Cell Signaling   | 11904      |
| BNIP3L/NIX                    | Rabbit  | 1:1000        | WB          | Cell Signaling   | 12396      |
| BNIP3                         | Mouse   | 1:1000        | WB          | Abcam            | ab10433    |
| FKBP8                         | Rabbit  | 1:1000        | WB          | ProteinTech      | 11173-1-AP |
| PHB2                          | Rabbit  | 1:1000        | WB          | Thermo Fisher    | PA5-14133  |
| FUNDC1                        | Rabbit  | 1:1000        | WB          | Cell Signaling   | 49240      |
| LC3                           | Rabbit  | 1:100         | IF          | Novus            | NB100-2220 |
| LAMP1                         | Rat     | 1:100         | IF          | DSHB             | 1D4B       |
| SQSTM1/p62                    | Mouse   | 1:100         | IF          | Abcam            | ab56416    |
| Ubiquitin (P4D1)              | Mouse   | 1:100         | IF          | Santa Cruz       | sc-8017    |
| NDUFS1                        | Rabbit  | 1:1000        | WB          | Abcam            | Ab169540   |
| UQCRC2                        | Mouse   | 1:1000        | WB          | Abcam            | Ab14745    |
| MT-CO1                        | Mouse   | 1:1000        | WB          | Invitrogen       | 459600     |
| SDHB                          | Mouse   | 1:1000        | WB          | Abcam            | Ab14714    |
| TIMM23                        | Mouse   | 1:1000        | WB          | BD               | 611222     |
| ATP5A                         | Mouse   | 1:1000        | WB          | Abcam            | ab14748    |
| POU4F1/Brn3a                  | Mouse   | 1:100         | IF          | Millipore        | MAB1585    |
| PKC $\alpha$                  | Rabbit  | 1:500         | IF          | Sigma            | P4334      |
| ConeArrestin                  | Rabbit  | 1:200         | IF          | Millipore        | AB15282    |
| VisualArrestin                | Mouse   | 1:200         | IF          | Santa Cruz       | sc-166383  |
| Alexa-647 Goat anti-Rabbit    | -       | 1:200         | IF          | Molecular Probes | A-21244    |
| Alexa-647 Goat anti-Mouse     | -       | 1:200         | IF          | Molecular Probes | A-21235    |
| Alexa-647 Goat anti-Rat       | -       | 1:200         | IF          | Molecular Probes | A-21247    |
| Alexa-488 Goat anti-Mouse     | -       | 1:200         | IF          | Molecular Probes | A-11001    |
| Pacific Blue Goat anti-Rabbit | -       | 1:200         | IF          | Invitrogen       | P-10994    |
| HRP Goat anti-Rabbit          | -       | 1:2000        | WB          | Invitrogen       | 31460      |
| HRP Goat anti-Mouse           | -       | 1:2000        | WB          | Invitrogen       | 31430      |

**Supplementary Table 1. Antibodies and dilutions.** IF: immunofluorescence; WB: western blot.
